# Supplementary material
Source: publisher figshare collection journal article supplement (https://sage.figshare.com/ndownloader/files/20030993)
Supplement: Supplementary file 1 [file 20030993]

Annex 1: Examples of questions presented for evaluation in  
**«Use and effectiveness of strategies »** and in **« Impact of communication strategies »**

- (a) Use of strategies
- (b) Effectiveness of strategies
- (c) Impact of communication strategies on communication with PWAD

|                |
|----------------|
| Lexical access |
|----------------|

When my loved one is searching for words or is confusing them:

a) I give him the choice of several words.

|              |                       |                  |                    |               |
|--------------|-----------------------|------------------|--------------------|---------------|
| <b>Never</b> | <b>Not very often</b> | <b>Sometimes</b> | <b>Quite often</b> | <b>Always</b> |
| <b>0</b>     | <b>1</b>              | <b>2</b>         | <b>3</b>           | <b>4</b>      |

b) It is effective

|                   |              |                   |                  |              |                       |
|-------------------|--------------|-------------------|------------------|--------------|-----------------------|
| <i>Not at all</i> | <i>A bit</i> | <i>Moderately</i> | <i>Very much</i> | <i>A lot</i> | <i>Not applicable</i> |
| <i>0</i>          | <i>1</i>     | <i>2</i>          | <i>3</i>         | <i>4</i>     | <i>0</i>              |

**c) Impact of communication strategies**

Using one or more strategies to help my close relative when he is searching for words improves our communication

|                   |              |                   |                  |              |
|-------------------|--------------|-------------------|------------------|--------------|
| <i>Not at all</i> | <i>A bit</i> | <i>Moderately</i> | <i>Very much</i> | <i>A lot</i> |
| <i>0</i>          | <i>1</i>     | <i>2</i>          | <i>3</i>         | <i>4</i>     |
